# Supplementary material
Source: HighWire-hosted journal article supplement (https://www.jneurosci.org/highwire/filestream/598804/field_highwire_adjunct_files/3/Supplemental_Table_3.pdf)
Supplement: Supplemental_Table_3.pdf [file Supplemental_Table_3.pdf]

SUPPLEMENTAL TABLE 3: Genes represented in clusters pictured in Figure 4. Genes that changed more than 20-fold through RGC development are listed in these tables. Time course data for all probes are available in Supplemental Table 1.

**From Figure 4A:**  
**Probes Falling**  
**Perinatally**

U49062\_at  
 U49062\_g\_at  
 Y14933mRNA\_s\_at  
 rc\_AA850708\_at  
 K02248cds\_s\_at  
 rc\_AA945737\_at  
 D84418\_s\_at  
 rc\_AI231423\_at  
 rc\_AA956286\_at  
 rc\_AI171983\_at  
 rc\_AI070278\_at  
 rc\_AI103410\_at  
 rc\_AA997533\_at  
 rc\_AI231489\_at  
 U23407\_at  
 rc\_AA964627\_at  
 rc\_AI071307\_at  
 U09540\_at  
 rc\_AA900704\_at  
 rc\_AA851471\_at  
 rc\_AI012354\_at  
 rc\_AI058810\_at  
 U09540\_g\_at  
 rc\_AI171462\_s\_at  
 rc\_AI044759\_at  
 rc\_AA957917\_s\_at  
 rc\_AI058975\_at  
 rc\_AI176856\_at  
 rc\_AI137958\_at  
 rc\_AA964868\_at  
 rc\_AI170353\_at  
 L20468\_at

**From Figure 4B:**  
**Probes Rising**  
**Perinatally**

M24852\_at  
 rc\_AA874803\_g\_at  
 M16112\_at  
 rc\_AA800948\_at  
 U55816\_at  
 rc\_AA997327\_at  
 rc\_AI145494\_at  
 rc\_AI044838\_at  
 rc\_AI136858\_at  
 rc\_AA955132\_at  
 M22253\_at

rc\_AA956689\_at  
 rc\_AA943576\_at  
 rc\_AI228050\_at  
 rc\_AA943601\_at  
 AF030358\_g\_at  
 rc\_AA892854\_at  
 rc\_AI639205\_at  
 rc\_AI111406\_at  
 rc\_AI044668\_at  
 rc\_AI029066\_at  
 rc\_AA818677\_at  
 rc\_AA924598\_at  
 Z75029\_s\_at  
 D88250\_at  
 rc\_AA943764\_at  
 rc\_AI059568\_at  
 X57573\_at  
 M36420\_s\_at  
 rc\_AI030695\_at  
 rc\_AA875037\_at  
 rc\_AI176174\_at  
 rc\_AA859581\_at  
 L00382cds\_at  
 rc\_AI102073\_at  
 rc\_AI059568\_g\_at  
 U27562\_at  
 AF091834\_at  
 X54656\_at  
 rc\_AI229172\_s\_at  
 rc\_AA891476\_at  
 rc\_AI009700\_at  
 rc\_AI233972\_at  
 rc\_AI072247\_at  
 rc\_AA924772\_at  
 rc\_AI145880\_at  
 U44845\_at  
 X67241cds\_at  
 rc\_AI104303\_at  
 rc\_AI060167\_at  
 rc\_AA924914\_at  
 D10666\_at  
 rc\_AI145381\_at  
 rc\_AI639118\_at  
 rc\_AI169077\_at  
 rc\_AI227991\_at  
 rc\_AA964584\_at  
 rc\_AI233246\_at  
 rc\_AA858724\_at  
 rc\_AI136674\_at  
 rc\_AA998683\_g\_at  
 rc\_AI171799\_at

AF098301\_at  
 rc\_AI228219\_at  
 rc\_AI145529\_at  
 rc\_AI029647\_at  
 rc\_AI007851\_at  
 rc\_AA943784\_s\_at  
 rc\_AA964069\_at  
 rc\_AI071150\_at  
 rc\_AI009783\_at  
 rc\_AI229196\_g\_at  
 rc\_AI112346\_at  
 rc\_AA860043\_at  
 rc\_AI028815\_at  
 rc\_AA925373\_at  
 U56261\_s\_at  
 M31178\_g\_at  
 rc\_AI175539\_at  
 J05510\_at  
 rc\_AI059345\_at  
 AF044201\_at  
 rc\_AA946313\_s\_at  
 rc\_AI180206\_at  
 rc\_AI058396\_s\_at  
 J03179\_at  
 U09631\_at  
 rc\_AI029179\_at  
 rc\_AI012648\_at  
 rc\_AI102578\_g\_at  
 rc\_AA819680\_at  
 rc\_AI235051\_at  
 M31603\_at  
 rc\_AA891204\_s\_at  
 L16764\_s\_at  
 J03179\_g\_at  
 M26744\_at  
 rc\_AA942924\_at  
 rc\_AI009623\_at  
 rc\_AA957929\_at  
 rc\_AI058869\_at  
 rc\_AA819292\_at  
 rc\_AI170948\_at  
 rc\_AA997894\_at  
 rc\_AI229073\_at  
 rc\_AI233904\_at  
 rc\_AI010584\_f\_at  
 rc\_AI071965\_s\_at  
 rc\_AI177026\_at  
 rc\_AA892864\_at  
 rc\_AA943054\_at  
 rc\_AI101500\_at  
 rc\_AI172567\_i\_at

rc\_AI014130\_at  
 U75928UTR#1\_s\_at  
 rc\_AA943229\_s\_at  
 rc\_AI228253\_at  
 rc\_AI009415\_f\_at  
 rc\_AI101379\_at  
 rc\_AI058768\_at  
 U10357\_g\_at  
 rc\_AI012208\_at  
 U69272\_at  
 rc\_AI177962\_at  
 rc\_AI010612\_at  
 X56325mRNA\_s\_at  
 rc\_AI072228\_at  
 rc\_AI072450\_at  
 rc\_AI137423\_at  
 rc\_AA848811\_at  
 S76779\_s\_at  
 X62839mRNA\_s\_at  
 rc\_AA943737\_at  
 rc\_AI230247\_s\_at  
 X17053mRNA\_s\_at  
 rc\_AI012182\_s\_at  
 D11445exon#1-4\_s\_at

**From Figure 4C:**  
**Genes Spiking**  
**Perinatally**

U72143\_i\_at  
 rc\_AA858520\_at  
 M11597\_at  
 M84488\_at  
 rc\_AI137820\_at  
 Y00396mRNA\_at  
 rc\_AA891302\_g\_at  
 rc\_AI009431\_at  
 J04486\_at  
 rc\_H31363\_at
